# Supplementary material
Source: Springer Nature journal article supplement (http://www.nature.com/nature/journal/v414/n6863/extref/414555ab.pdf)
Supplement: 414555ab.pdf [file 414555ab.pdf]

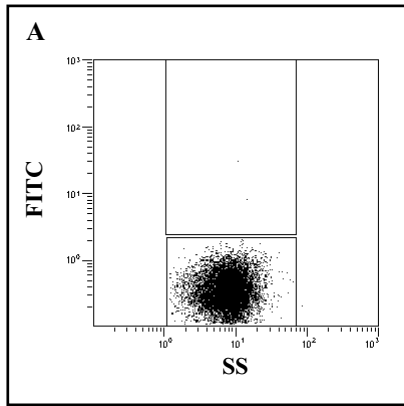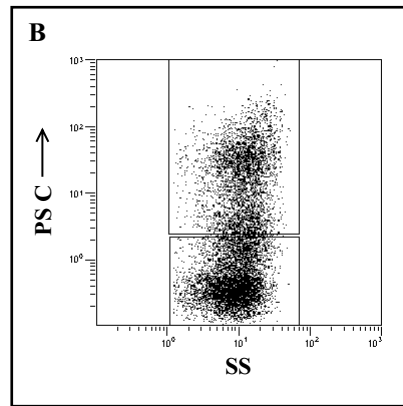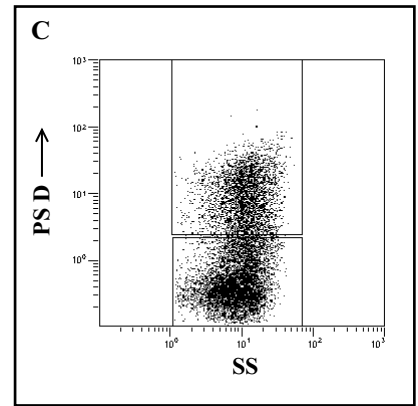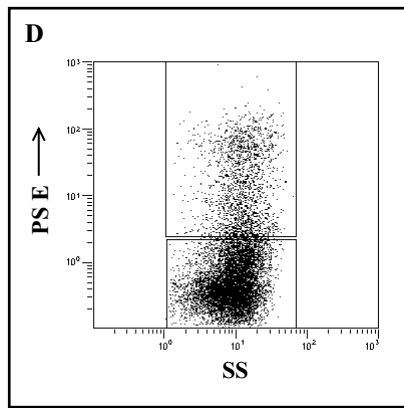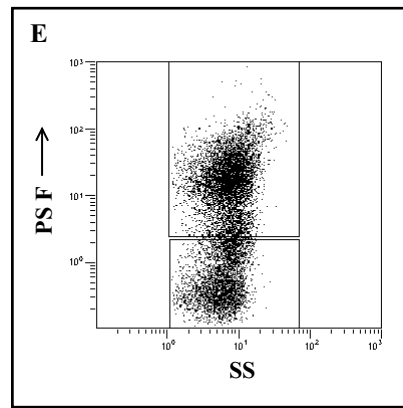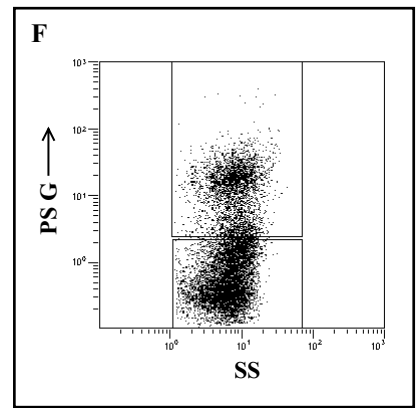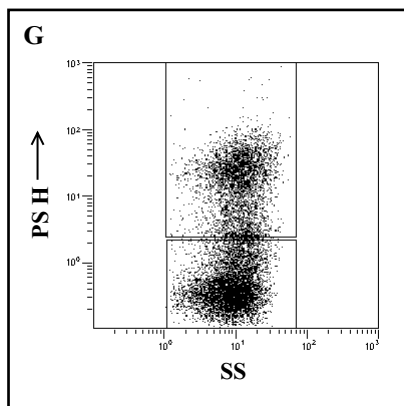

Web Fig 2. Flow cytometric analyses demonstrating variable expression (ON-OFF) of B: PS C, C: PS D, D: PS E, E: PS F, F: PS G, G: PS H. All primary antibodies were derived in rabbits and were monospecific for the indicated polysaccharide. Secondary antibody was a phycoerythrin-labeled anti-rabbit IgG. Panel A indicates an unlabeled population.
